# Supplementary material
Source: MDPI journal article supplement (https://www.mdpi.com/2077-0472/13/5/985)
Supplement: s1 [file s1]

**Table S1: Sorghum parental genotypes pollen fertility percentage and *in-vitro* pollen germination percentage in 2018.**

| <b>Parents</b> | <b>Pollen fertility percentage</b> | <b><i>in-vitro</i> pollen germination percentage</b> |
|----------------|------------------------------------|------------------------------------------------------|
| AKMS 30B       | 81.8                               | 55.1                                                 |
| AKRMS 45B      | 80.3                               | 54.3                                                 |
| AKRMS 66-2B    | 78.5                               | 33.3                                                 |
| RS 585         | 81.4                               | 65.0                                                 |
| AKR-354        | 83.9                               | 71.5                                                 |
| AKRB-335-3     | 92.5                               | 74.5                                                 |
| SLR-24         | 86.2                               | 66.6                                                 |
| AKRB-428       | 88.2                               | 72.5                                                 |
| RB-324         | 80.4                               | 70.5                                                 |
| Rb-413-1       | 83.3                               | 71.5                                                 |
| AKRB-429       | 84.3                               | 72.5                                                 |
| AKRB- 430      | 81.9                               | 66.6                                                 |
| AKRB-431       | 92.6                               | 75.5                                                 |

**Table S2: Sorghum parental genotypes pollen fertility percentage and *in-vitro* pollen germination percentage in 2019**

| <b>Parents</b> | <b>Pollen fertility percentage</b> | <b><i>in-vitro</i> pollen germination percentage</b> |
|----------------|------------------------------------|------------------------------------------------------|
| AKMS 30B       | 83.2                               | 57.3                                                 |
| AKRMS 45B      | 81.2                               | 56.1                                                 |
| AKRMS 66-2B    | 77.6                               | 34.1                                                 |
| RS 585         | 82.7                               | 68.1                                                 |
| AKR-354        | 85.2                               | 72.7                                                 |
| AKRB-335-3     | 94.9                               | 75.8                                                 |
| SLR-24         | 88.4                               | 68.3                                                 |
| AKRB-428       | 89.9                               | 74.4                                                 |
| RB-324         | 82.5                               | 71.9                                                 |
| Rb-413-1       | 85.6                               | 72.6                                                 |
| AKRB-429       | 87.2                               | 74.2                                                 |
| AKRB- 430      | 85.4                               | 68.3                                                 |
| AKRB-431       | 95.1                               | 78.2                                                 |

**Table S3. Pooled data of Sorghum parental genotypes pollen fertility percentage and *in-vitro* pollen germination percentage.**

| <b>Parents</b> | <b>Pollen fertility percentage</b> | <b><i>in-vitro</i> pollen germination percentage</b> |
|----------------|------------------------------------|------------------------------------------------------|
| AKMS 30B       | 82.5                               | 56.2                                                 |
| AKRMS 45B      | 80.75                              | 55.2                                                 |
| AKRMS 66-2B    | 78.05                              | 33.715                                               |
| RS 585         | 82.05                              | 66.55                                                |
| AKR-354        | 84.545                             | 72.1                                                 |
| AKRB-335-3     | 93.685                             | 75.15                                                |
| SLR-24         | 87.3                               | 67.45                                                |
| AKRB-428       | 89.05                              | 73.45                                                |
| RB-324         | 81.445                             | 71.2                                                 |
| Rb-413-1       | 84.465                             | 72.05                                                |
| AKRB-429       | 85.75                              | 73.35                                                |
| AKRB- 430      | 83.65                              | 67.45                                                |
| AKRB-431       | 93.865                             | 76.85                                                |

**Table S4. Sorghum F<sub>1</sub> hybrids pollen fertility percentage and *in-vitro* pollen germination percentage in 2018.**

| <b>Genotypes</b>         | <b>Pollen fertility percentage</b> | <b><i>in-vitro</i> pollen germination percentage</b> |
|--------------------------|------------------------------------|------------------------------------------------------|
| AKMS 30A × RS 585        | 79.1                               | 53.5                                                 |
| AKMS 30A × AKR 354       | 51.1                               | 45.6                                                 |
| AKMS 30A × AKRB-335-3    | 93.1                               | 78.2                                                 |
| AKMS 30A × SLR-24        | 51.3                               | 25.0                                                 |
| AKMS 30A × AKRB-428      | 86.0                               | 66.6                                                 |
| AKMS 30A × RB-324        | 0.0                                | 0.0                                                  |
| AKMS 30A × Rb-413-1      | 81.3                               | 56.5                                                 |
| AKMS 30A × AKRB-429      | 83.9                               | 65.5                                                 |
| AKMS 30A × AKRB-430      | 83.0                               | 61.2                                                 |
| AKMS 30A × AKRB-431      | 93.6                               | 81.5                                                 |
| AKRMS 45A × RS 585       | 52.1                               | 33.3                                                 |
| AKRMS 45A × AKR 354      | 62.9                               | 40.6                                                 |
| AKRMS 45A × AKRB-335-3   | 80.6                               | 59.5                                                 |
| AKRMS 45A × SLR-24       | 52.8                               | 42.8                                                 |
| AKRMS 45A × AKRB-428     | 81.4                               | 59.5                                                 |
| AKRMS 45A × RB-324       | 0.0                                | 0.0                                                  |
| AKRMS 45A × Rb-413-1     | 80.2                               | 58.5                                                 |
| AKRMS 45A × AKRB-429     | 74.2                               | 50.0                                                 |
| AKRMS 45A × AKRB-430     | 77.3                               | 52.5                                                 |
| AKRMS 45A × AKRB-431     | 56.4                               | 42.8                                                 |
| AKRMS 66-2A × RS 585     | 73.4                               | 48.5                                                 |
| AKRMS 66-2A × AKR 354    | 75.0                               | 50.0                                                 |
| AKRMS 66-2A × AKRB-335-3 | 72.9                               | 51.2                                                 |
| AKRMS 66-2A × SLR-24     | 50.7                               | 46.2                                                 |
| AKRMS 66-2A × AKRB-428   | 79.5                               | 54.6                                                 |
| AKRMS 66-2A × RB-324     | 0.0                                | 0.0                                                  |
| AKRMS 66-2A × Rb-413-1   | 73.5                               | 33.3                                                 |
| AKRMS 66-2A × AKRB-429   | 74.3                               | 52.5                                                 |
| AKRMS 66-2A × AKRB-430   | 73.7                               | 42.8                                                 |
| AKRMS 66-2A × AKRB-431   | 52.9                               | 33.3                                                 |
| CSH 15R (Checks)         | 82.3                               | 58.5                                                 |
| CSH 19R (Checks)         | 82.0                               | 62.2                                                 |

**Table S5. Sorghum F<sub>1</sub> hybrids pollen fertility percentage and *in-vitro* pollen germination percentage in 2019.**

| <b>Genotypes</b>         | <b>Pollen fertility percentage</b> | <b><i>in-vitro</i> pollen germination percentage</b> |
|--------------------------|------------------------------------|------------------------------------------------------|
| AKMS 30A × RS 585        | 76.3                               | 51.6                                                 |
| AKMS 30A × AKR 354       | 53.2                               | 47.1                                                 |
| AKMS 30A × AKRB-335-3    | 94.3                               | 77.3                                                 |
| AKMS 30A × SLR-24        | 53.2                               | 29.0                                                 |
| AKMS 30A × AKRB-428      | 88.6                               | 67.5                                                 |
| AKMS 30A × RB-324        | 0.0                                | 0.0                                                  |
| AKMS 30A × Rb-413-1      | 82.4                               | 57.2                                                 |
| AKMS 30A × AKRB-429      | 84.3                               | 97.6                                                 |
| AKMS 30A × AKRB-430      | 85.1                               | 62.3                                                 |
| AKMS 30A × AKRB-431      | 94.1                               | 82.1                                                 |
| AKRMS 45A × RS 585       | 53.2                               | 34.1                                                 |
| AKRMS 45A × AKR 354      | 63.5                               | 41.2                                                 |
| AKRMS 45A × AKRB-335-3   | 81.2                               | 61.3                                                 |
| AKRMS 45A × SLR-24       | 54.5                               | 43.7                                                 |
| AKRMS 45A × AKRB-428     | 81.8                               | 61.2                                                 |
| AKRMS 45A × RB-324       | 0.0                                | 0.0                                                  |
| AKRMS 45A × Rb-413-1     | 82.1                               | 59.3                                                 |
| AKRMS 45A × AKRB-429     | 75.9                               | 51.3                                                 |
| AKRMS 45A × AKRB-430     | 78.6                               | 54.1                                                 |
| AKRMS 45A × AKRB-431     | 58.1                               | 44.3                                                 |
| AKRMS 66-2A × RS 585     | 75.1                               | 49.4                                                 |
| AKRMS 66-2A × AKR 354    | 76.3                               | 51.1                                                 |
| AKRMS 66-2A × AKRB-335-3 | 73.4                               | 52.4                                                 |
| AKRMS 66-2A × SLR-24     | 51.3                               | 47.3                                                 |
| AKRMS 66-2A × AKRB-428   | 80.3                               | 55.7                                                 |
| AKRMS 66-2A × RB-324     | 0.0                                | 0.0                                                  |
| AKRMS 66-2A × Rb-413-1   | 75.3                               | 35.2                                                 |
| AKRMS 66-2A × AKRB-429   | 75.6                               | 53.1                                                 |
| AKRMS 66-2A × AKRB-430   | 71.3                               | 41.4                                                 |
| AKRMS 66-2A × AKRB-431   | 51.3                               | 32.6                                                 |
| CSH 15R (Checks)         | 83.1                               | 59.1                                                 |
| CSH 19R (Checks)         | 83.4                               | 63.5                                                 |

**Table S6. Pooled data of Sorghum F<sub>1</sub> hybrids pollen fertility percentage and *in-vitro* pollen germination percentage.**

| <b>Genotypes</b>         | <b>Pollen fertility percentage</b> | <b><i>in-vitro</i> pollen germination percentage</b> |
|--------------------------|------------------------------------|------------------------------------------------------|
| AKMS 30A × RS 585        | 77.7                               | 52.6                                                 |
| AKMS 30A × AKR 354       | 52.1                               | 46.4                                                 |
| AKMS 30A × AKRB-335-3    | 93.7                               | 77.8                                                 |
| AKMS 30A × SLR-24        | 52.3                               | 27.0                                                 |
| AKMS 30A × AKRB-428      | 87.3                               | 67.1                                                 |
| AKMS 30A × RB-324        | 0.0                                | 0.0                                                  |
| AKMS 30A × Rb-413-1      | 81.8                               | 56.9                                                 |
| AKMS 30A × AKRB-429      | 84.1                               | 81.6                                                 |
| AKMS 30A × AKRB-430      | 84.1                               | 61.8                                                 |
| AKMS 30A × AKRB-431      | 93.9                               | 81.8                                                 |
| AKRMS 45A × RS 585       | 52.6                               | 33.7                                                 |
| AKRMS 45A × AKR 354      | 63.2                               | 40.9                                                 |
| AKRMS 45A × AKRB-335-3   | 80.9                               | 60.4                                                 |
| AKRMS 45A × SLR-24       | 53.7                               | 43.3                                                 |
| AKRMS 45A × AKRB-428     | 81.6                               | 60.4                                                 |
| AKRMS 45A × RB-324       | 0.0                                | 0.0                                                  |
| AKRMS 45A × Rb-413-1     | 81.2                               | 58.9                                                 |
| AKRMS 45A × AKRB-429     | 75.1                               | 50.7                                                 |
| AKRMS 45A × AKRB-430     | 77.9                               | 53.3                                                 |
| AKRMS 45A × AKRB-431     | 57.3                               | 43.6                                                 |
| AKRMS 66-2A × RS 585     | 74.2                               | 49.0                                                 |
| AKRMS 66-2A × AKR 354    | 75.7                               | 50.6                                                 |
| AKRMS 66-2A × AKRB-335-3 | 73.1                               | 51.8                                                 |
| AKRMS 66-2A × SLR-24     | 51.0                               | 46.8                                                 |
| AKRMS 66-2A × AKRB-428   | 79.9                               | 55.2                                                 |
| AKRMS 66-2A × RB-324     | 0.0                                | 0.0                                                  |
| AKRMS 66-2A × Rb-413-1   | 74.4                               | 34.3                                                 |
| AKRMS 66-2A × AKRB-429   | 74.9                               | 52.8                                                 |
| AKRMS 66-2A × AKRB-430   | 72.5                               | 42.1                                                 |
| AKRMS 66-2A × AKRB-431   | 52.1                               | 33.0                                                 |
| CSH 15R (Checks)         | 82.7                               | 58.8                                                 |
| CSH 19R (Checks)         | 82.7                               | 62.9                                                 |

**Table S7: Morphological data of Sorghum parental lines**

| Genotypes   | Plant Height (cm) |      |             | Panicle Length (cm) |      |             | Panicle Width (cm) |      |             | Anther Extrusion (no) |      |             | Anther Morphology                                     |                                                       |
|-------------|-------------------|------|-------------|---------------------|------|-------------|--------------------|------|-------------|-----------------------|------|-------------|-------------------------------------------------------|-------------------------------------------------------|
|             | 2018              | 2019 | Pooled Data | 2018                | 2019 | Pooled Data | 2018               | 2019 | Pooled Data | 2018                  | 2019 | Pooled Data | 2018                                                  | 2019                                                  |
| AKMS 30B    | 126               | 134  | 130         | 18.4                | 17.3 | 17.85       | 3.6                | 3.9  | 3.75        | 1.3                   | 1.7  | 1.5         | Pale yellow coloured with ample amount of pollen load | Pale yellow coloured with ample amount of pollen load |
| AKRMS 45B   | 131               | 142  | 136.5       | 16.8                | 18.6 | 17.7        | 4.1                | 3.4  | 3.75        | 1.4                   | 1.6  | 1.5         | Pale yellow coloured with ample amount of pollen load | Pale yellow coloured with ample amount of pollen load |
| AKRMS 66-2B | 117               | 126  | 121.5       | 17.3                | 19.1 | 18.2        | 3.2                | 4    | 3.6         | 1.2                   | 1.4  | 1.3         | Pale yellow coloured with ample amount of pollen load | Pale yellow coloured with ample amount of pollen load |
| RS 585      | 190               | 196  | 193         | 20.1                | 21.3 | 20.7        | 4.2                | 4.8  | 4.5         | 3.1                   | 2.8  | 2.95        | Yellow coloured with large amount of pollen load      | Yellow coloured with large amount of pollen load      |
| AKR-354     | 175               | 181  | 178         | 21.4                | 20.7 | 21.05       | 4.3                | 4    | 4.15        | 3                     | 2.6  | 2.8         | Yellow coloured with large amount of pollen load      | Yellow coloured with large amount of pollen load      |
| AKRB-335-3  | 181               | 188  | 184.5       | 19.4                | 18.1 | 18.75       | 5.1                | 4.5  | 4.8         | 3.3                   | 3    | 3.15        | Yellow coloured with large amount of pollen load      | Yellow coloured with large amount of pollen load      |
| SLR-24      | 195               | 197  | 196         | 18.3                | 17.4 | 17.85       | 3.9                | 4.4  | 4.15        | 2.3                   | 2.6  | 2.45        | Yellow coloured with large amount of pollen load      | Yellow coloured with large amount of pollen load      |
| AKRB-428    | 201               | 192  | 196.5       | 19.6                | 18.7 | 19.15       | 4.8                | 4.2  | 4.5         | 2.9                   | 2.8  | 2.85        | Yellow coloured with large amount of pollen load      | Yellow coloured with large amount of pollen load      |
| RB-324      | 196               | 183  | 189.5       | 16.4                | 17.7 | 17.05       | 5                  | 3.9  | 4.45        | 2.6                   | 2.4  | 2.5         | Yellow coloured with large amount of pollen load      | Yellow coloured with large amount of pollen load      |
| Rb-413-1    | 188               | 191  | 189.5       | 15.9                | 16.8 | 16.35       | 4.4                | 4.1  | 4.25        | 2.4                   | 2.2  | 2.3         | Yellow coloured with large amount of pollen load      | Yellow coloured with large amount of pollen load      |
| AKRB-429    | 205               | 197  | 201         | 21.1                | 22.3 | 21.7        | 3.7                | 4    | 3.85        | 2.3                   | 2.9  | 2.6         | Yellow coloured with large amount of pollen load      | Yellow coloured with large amount of pollen load      |
| AKRB-430    | 178               | 185  | 181.5       | 20.9                | 19.6 | 20.25       | 4.9                | 5.3  | 5.1         | 2.6                   | 2.9  | 2.75        | Yellow coloured with large amount of pollen load      | Yellow coloured with large amount of pollen load      |
| AKRB-431    | 169               | 165  | 167         | 17.8                | 18.9 | 18.35       | 5                  | 5.4  | 5.2         | 3                     | 3.1  | 3.05        | Yellow coloured with large amount of pollen load      | Yellow coloured with large amount of pollen load      |

**Table S8: Morphological data of Sorghum hybrids and checks.**

|                        | Plant Height<br>(cm) |          |                | Panicle Length<br>(cm) |          |                | Panicle Width<br>(cm) |          |                | Anther<br>Extrusion (no) |          |                | Anther Morphology                                     |                                                       |
|------------------------|----------------------|----------|----------------|------------------------|----------|----------------|-----------------------|----------|----------------|--------------------------|----------|----------------|-------------------------------------------------------|-------------------------------------------------------|
| Hybrids                | 20<br>18             | 20<br>19 | Pooled<br>Data | 20<br>18               | 20<br>19 | Pooled<br>Data | 20<br>18              | 20<br>19 | Pooled<br>Data | 20<br>18                 | 20<br>19 | Pooled<br>Data | 2018                                                  | 2019                                                  |
| AKMS 30A × RS 585      | 20<br>2              | 19<br>6  | 199            | 23<br>.6               | 24<br>.7 | 24.15          | 5.<br>6               | 4.<br>8  | 5.2            | 3.<br>4                  | 2.<br>8  | 3.1            | Yellow coloured with large amount of pollen load      | Yellow coloured with large amount of pollen load      |
| AKMS 30A × AKR 354     | 18<br>6              | 19<br>5  | 190.5          | 22<br>.1               | 21<br>.4 | 21.75          | 4.<br>1               | 5.<br>3  | 4.7            | 2.<br>9                  | 3.<br>3  | 3.1            | Pale yellow coloured with small amount of pollen load | Pale yellow coloured with small amount of pollen load |
| AKMS 30A × AKRB-335-3  | 19<br>9              | 20<br>7  | 203            | 23<br>.9               | 25<br>.8 | 24.85          | 5.<br>8               | 6.<br>4  | 6.1            | 3.<br>9                  | 4.<br>8  | 4.35           | Yellow coloured with large amount of pollen load      | Yellow coloured with large amount of pollen load      |
| AKMS 30A × SLR-24      | 21<br>1              | 22<br>5  | 218            | 26<br>.3               | 24<br>.9 | 25.6           | 4.<br>8               | 4.<br>2  | 4.5            | 3.<br>1                  | 2.<br>9  | 3              | Pale yellow coloured with small amount of pollen load | Pale yellow coloured with small amount of pollen load |
| AKMS 30A × AKRB-428    | 23<br>1              | 21<br>2  | 221.5          | 27<br>.8               | 28<br>.6 | 28.2           | 5.<br>5               | 5.<br>7  | 5.6            | 3.<br>8                  | 4.<br>2  | 4              | Yellow coloured with large amount of pollen load      | Yellow coloured with large amount of pollen load      |
| AKMS 30A × RB-324      | 21<br>3              | 20<br>4  | 208.5          | 25<br>.5               | 26<br>.8 | 26.15          | 3.<br>1               | 3.<br>3  | 3.2            | 1.<br>6                  | 1.<br>9  | 1.75           | White /Pale colored and flattened                     | White/Pale colored and flattened                      |
| AKMS 30A × Rb-413-1    | 21<br>7              | 20<br>1  | 209            | 23<br>.1               | 20<br>.8 | 21.95          | 5.<br>5               | 6.<br>1  | 5.8            | 4.<br>1                  | 4.<br>5  | 4.3            | Yellow coloured with large amount of pollen load      | Yellow coloured with large amount of pollen load      |
| AKMS 30A × AKRB-429    | 23<br>0              | 24<br>0  | 235            | 24<br>.7               | 22<br>.1 | 23.4           | 5.<br>3               | 5.<br>5  | 5.4            | 3.<br>8                  | 3.<br>3  | 3.55           | Yellow coloured with large amount of pollen load      | Yellow coloured with large amount of pollen load      |
| AKMS 30A × AKRB-430    | 18<br>6              | 19<br>9  | 192.5          | 20<br>.3               | 21<br>.2 | 20.75          | 5.<br>8               | 4.<br>9  | 5.35           | 4.<br>2                  | 3.<br>4  | 3.8            | Yellow coloured with large amount of pollen load      | Yellow coloured with large amount of pollen load      |
| AKMS 30A × AKRB-431    | 18<br>1              | 19<br>5  | 188            | 19<br>.8               | 21<br>.6 | 20.7           | 6.<br>2               | 5.<br>6  | 5.9            | 4.<br>4                  | 3.<br>1  | 3.75           | Yellow coloured with large amount of pollen load      | Yellow coloured with large amount of pollen load      |
| AKRMS 45A × RS 585     | 20<br>9              | 21<br>7  | 213            | 24<br>.9               | 26<br>.6 | 25.75          | 4.<br>3               | 4.<br>8  | 4.55           | 3                        | 3.<br>2  | 3.1            | Pale yellow coloured with small amount of pollen load | Pale yellow coloured with small amount of pollen load |
| AKRMS 45A × AKR 354    | 20<br>4              | 19<br>8  | 201            | 25<br>.3               | 27<br>.1 | 26.2           | 4.<br>2               | 3.<br>9  | 4.05           | 3.<br>1                  | 3.<br>5  | 3.3            | Yellow coloured with large amount of pollen load      | Yellow coloured with large amount of pollen load      |
| AKRMS 45A × AKRB-335-3 | 22<br>7              | 23<br>5  | 231            | 23<br>.8               | 25<br>.2 | 24.5           | 5.<br>3               | 4.<br>1  | 4.7            | 3.<br>4                  | 3.<br>8  | 3.6            | Yellow coloured with large amount of pollen load      | Yellow coloured with large amount of pollen load      |
| AKRMS 45A × SLR-24     | 23<br>3              | 23<br>8  | 235.5          | 24<br>.3               | 25<br>.6 | 24.95          | 3.<br>6               | 4.<br>1  | 3.85           | 2.<br>8                  | 2.<br>6  | 2.7            | Pale yellow coloured with small amount of pollen load | Pale yellow coloured with small amount of pollen load |
| AKRMS 45A × AKRB-428   | 22<br>3              | 21<br>4  | 218.5          | 23<br>.7               | 22<br>.5 | 23.1           | 4.<br>4               | 4.<br>9  | 4.65           | 3.<br>3                  | 3.<br>6  | 3.45           |                                                       |                                                       |
| AKRMS 45A × RB-324     | 21<br>7              | 22<br>1  | 219            | 21<br>.9               | 20<br>.6 | 21.25          | 3.<br>3               | 3.<br>7  | 3.5            | 1.<br>9                  | 2.<br>2  | 2.05           | White /Pale colored and flattened                     | White/Pale colored and flattened                      |

|                             |         |         |       |          |          |       |         |         |      |         |         |      |                                                          |                                                          |
|-----------------------------|---------|---------|-------|----------|----------|-------|---------|---------|------|---------|---------|------|----------------------------------------------------------|----------------------------------------------------------|
| AKRMS 45A ×<br>Rb-413-1     | 23<br>0 | 21<br>5 | 222.5 | 25<br>.7 | 27<br>.8 | 26.75 | 4.<br>1 | 4.<br>5 | 4.3  | 2.<br>9 | 3.<br>7 | 3.3  | Yellow coloured with large<br>amount of pollen load      | Yellow coloured with large<br>amount of pollen load      |
| AKRMS 45A ×<br>AKRB-429     | 25<br>0 | 26<br>3 | 256.5 | 24<br>.1 | 26<br>.4 | 25.25 | 4.<br>3 | 3.<br>8 | 4.05 | 2.<br>6 | 2.<br>9 | 2.75 | Yellow coloured with large<br>amount of pollen load      | Yellow coloured with large<br>amount of pollen load      |
| AKRMS 45A ×<br>AKRB-430     | 20<br>6 | 22<br>2 | 214   | 22<br>.8 | 24<br>.9 | 23.85 | 5.<br>5 | 5.<br>9 | 5.7  | 4.<br>2 | 4.<br>6 | 4.4  | Yellow coloured with large<br>amount of pollen load      | Yellow coloured with large<br>amount of pollen load      |
| AKRMS 45A ×<br>AKRB-431     | 19<br>0 | 18<br>6 | 188   | 25<br>.4 | 23<br>.8 | 24.6  | 5.<br>3 | 6.<br>1 | 5.7  | 3.<br>5 | 4.<br>2 | 3.85 | Pale yellow coloured with<br>small amount of pollen load | Pale yellow coloured with<br>small amount of pollen load |
| AKRMS 66-2A ×<br>RS 585     | 19<br>9 | 20<br>7 | 203   | 24<br>.6 | 21<br>.9 | 23.25 | 5.<br>2 | 4.<br>3 | 4.75 | 3.<br>1 | 3.<br>6 | 3.35 | Yellow coloured with large<br>amount of pollen load      | Yellow coloured with large<br>amount of pollen load      |
| AKRMS 66-2A ×<br>AKR 354    | 18<br>7 | 19<br>3 | 190   | 20<br>.7 | 22<br>.6 | 21.65 | 4.<br>7 | 4.<br>1 | 4.4  | 2.<br>4 | 2.<br>1 | 2.25 | Yellow coloured with large<br>amount of pollen load      | Yellow coloured with large<br>amount of pollen load      |
| AKRMS 66-2A ×<br>AKRB-335-3 | 20<br>3 | 19<br>5 | 199   | 19<br>.8 | 22<br>.3 | 21.05 | 5.<br>8 | 6.<br>5 | 6.15 | 3.<br>8 | 4.<br>2 | 4    | Yellow coloured with large<br>amount of pollen load      | Yellow coloured with large<br>amount of pollen load      |
| AKRMS 66-2A ×<br>SLR-24     | 21<br>8 | 21<br>0 | 214   | 21<br>.6 | 20<br>.9 | 21.25 | 5.<br>4 | 4.<br>3 | 4.85 | 3.<br>2 | 3.<br>5 | 3.35 | Pale yellow coloured with<br>small amount of pollen load | Pale yellow coloured with<br>small amount of pollen load |
| AKRMS 66-2A ×<br>AKRB-428   | 23<br>0 | 23<br>4 | 232   | 24<br>.5 | 25<br>.2 | 24.85 | 4.<br>2 | 4.<br>9 | 4.55 | 2.<br>9 | 3.<br>1 | 3    | Pale yellow coloured with<br>small amount of pollen load | Pale yellow coloured with<br>small amount of pollen load |
| AKRMS 66-2A ×<br>RB-324     | 24<br>1 | 24<br>9 | 245   | 22<br>.9 | 22<br>.5 | 22.7  | 2.<br>8 | 3.<br>1 | 2.95 | 1.<br>5 | 1.<br>2 | 1.35 | White /Pale colored and<br>flattened                     | White/Pale colored and<br>flattened                      |
| AKRMS 66-2A ×<br>Rb-413-1   | 20<br>3 | 21<br>1 | 207   | 23<br>.8 | 24<br>.5 | 24.15 | 4       | 4.<br>9 | 4.45 | 2.<br>3 | 2.<br>7 | 2.5  | Yellow coloured with large<br>amount of pollen load      | Yellow coloured with large<br>amount of pollen load      |
| AKRMS 66-2A ×<br>AKRB-429   | 22<br>3 | 21<br>8 | 220.5 | 24<br>.4 | 21<br>.6 | 23    | 5.<br>2 | 3.<br>9 | 4.55 | 3.<br>4 | 3.<br>1 | 3.25 | Yellow coloured with large<br>amount of pollen load      | Yellow coloured with large<br>amount of pollen load      |
| AKRMS 66-2A ×<br>AKRB-430   | 19<br>0 | 19<br>3 | 191.5 | 22<br>.3 | 21<br>.1 | 21.7  | 5.<br>7 | 4.<br>3 | 5    | 3.<br>6 | 2.<br>9 | 3.25 | Yellow coloured with large<br>amount of pollen load      | Yellow coloured with large<br>amount of pollen load      |
| AKRMS 66-2A ×<br>AKRB-431   | 18<br>5 | 18<br>1 | 183   | 25<br>.6 | 27<br>.9 | 26.75 | 3.<br>9 | 4.<br>9 | 4.4  | 2.<br>8 | 3.<br>1 | 2.95 | Pale yellow coloured with<br>small amount of pollen load | Pale yellow coloured with<br>small amount of pollen load |
| CSH 15R<br>(Checks)         | 16<br>4 | 17<br>2 | 168   | 23<br>.1 | 24<br>.8 | 23.95 | 5.<br>2 | 5       | 5.1  | 3.<br>4 | 2.<br>9 | 3.15 | Yellow coloured with large<br>amount of pollen load      | Yellow coloured with large<br>amount of pollen load      |
| CSH 19R<br>(Checks)         | 18<br>0 | 17<br>5 | 177.5 | 24<br>.3 | 24<br>.5 | 24.4  | 4.<br>8 | 5.<br>3 | 5.05 | 3.<br>1 | 3.<br>6 | 3.35 | Yellow coloured with large<br>amount of pollen load      | Yellow coloured with large<br>amount of pollen load      |
